# Supplementary material for: IFN-I-tolerant oncolytic Semliki Forest virus in combination with anti-PD1 enhances T cell response against mouse glioma
Source: PubMed Central journal article supplement — Mol Ther Oncolytics. 2021 Mar 17;21:37–46. doi: 10.1016/j.omto.2021.03.008 (PMC8042242; doi:10.1016/j.omto.2021.03.008), 2021-03-17
Supplement: mmc1.pdf [file mmc1.pdf]

**OMTO, Volume 21**

**Supplemental information**

**IFN-I-tolerant oncolytic Semliki Forest virus  
in combination with anti-PD1 enhances  
T cell response against mouse glioma**

**Miika Martikainen, Mohanraj Ramachandran, Roberta Lugano, Jing Ma, Minttu-Maria Martikainen, Anna Dimberg, Di Yu, Andres Merits, and Magnus Essand**

## **Supplemental methods**

### **Mouse CT-2A and NXS2 cell lines**

CT-2A-Fluc cells (provided by Jan Brun, Children's Hospital of Eastern Ontario) were cultured in Gibco RPMI-1640 medium supplemented with 10% fetal bovine serum (FBS), 10 U/ml Penicillin-Streptomycin, and 1mM sodium pyruvate (Thermo Fischer Scientific). NXS2 cells were cultured in Gibco DMEM Glutamax (Thermo Fischer Scientific) supplemented with 10% FBS, PEST, and sodium pyruvate. For cell viability assay cells were seeded on 96-well plate (20,000 cells/well) and infected on the next day with virus (diluted in complete cell culture medium) at different MOIs. Cell viability was measured using CellTiter 96 AQueous One Solution Cell Proliferation Assay (Promega, Madison, WI, US) according to manufacturer's instructions 72h after infection.

### **SFV production and titration**

BHK-21 cells were seeded in a 6-well plate and transfected with virus cDNA plasmid using Lipofectamine 3000 reagent (Thermo Fischer Scientific). 48 hours after transfection, p0 virus stock was harvested. 200µl p0 stock was added to a confluent T175 flask of BHK-21 cells to produce the p1 stock, which was harvested 24h later and concentrated by ultracentrifugation on a 20% sucrose cushion (2h, 140,000 x g, 4°C).

Virus was titrated by infecting BHK-21 cells seeded on 6 well-plate (500,000 cells/well) were with 200µl of virus diluted in culture medium. 30mins later the cells were covered with 0.6% CMC-containing medium. The cell layer was stained two days later with crystal violet to visualize the plaques. Titer was counted as plaque forming units (PFU)/ml.

### **xCELLigence assay**

50µl culture medium was added into each well and incubated at room temperature for 30 min for the impedance baseline measurement. 10,000 GL261 cells were added into each well in 100µl volume and incubated at room temperature for 30min. Virus (MOI = 0.01) was added at

indicated timepoint in 50µl volume. The plates were monitored in the system at 37°C under 5% CO<sub>2</sub> at 15-min time intervals.

### **Staining of slice cultures**

Blocking overnight (2% BSA, 0.25% Triton X-100 in PBS), primary antibody staining overnight at +4°C with rabbit anti-SFV (kind gift from Ari Hinkkanen, University of Eastern Finland, Finland) and hamster anti-CD31 (Thermo Fisher Scientific, 2H8) diluted in blocking buffer, washing 5x10 min at room temperature with 0.25% Triton X-100, Secondary antibody staining overnight at +4°C with Life Technologies Alexa Fluor 488-conjugated donkey anti-rabbit and Alexa Fluor 647-conjugated goat Anti-hamster (Thermo Fischer Scientific), washing as before, staining with Invitrogen Hoechst 33342 (Thermo Fischer Scientific), washing as before, mounting on microscope cover slide (SuperFrost) using Fluoromount-G (Thermo Fischer Scientific). Imaging of the slides was done with confocal microscope (Leica, Germany).

**Table S1. Primers used in RT-qPCR analysis.**

|              |                          |
|--------------|--------------------------|
| mIFNb-forw   | AAGAGTTACACTGCCTTTGCCATC |
| mIFNb-rev    | CACTGTCTGCTGGTGGAGTTCATC |
| mPD-L1-forw  | TGCTGCATAATCAGCTACGG     |
| mPD-L1-rev   | GCTGGTCACATTGAGAAGCA     |
| mTNFa-forw   | TGGCCCAGACCCTCACACTCAG   |
| mTNFa-rev    | ACCCATCGGCTGGCACCACT     |
| mIFIT1-forw  | CCATAGCGGAGGTGAATATC     |
| mIFIT1-rev   | GGCAGGACAATGTGCAAGAA     |
| mISG15-forw  | GGTGTCCGTGACTAACTCCAT    |
| mISG15-rev   | CTGTACCACTAGCATCACTGTG   |
| mCXCL10-forw | GGATGGCTGTCCTAGCTCTG     |
| mCXCL10-rev  | TGAGCTAGGGAGGACAAGGA     |
| mGAPDH-frow  | CAAGGAGTAAGAAACCCTGGACC  |
| mGAPDH-rev   | CGAGTTGGATAGGGCCTCT      |
| mISG20-forw  | CAATGCCCTGAAGGAGGATA     |
| mISG20-rev   | TGTAGCAGGCGCTTACACAG     |

**Table S2. Antibodies used in FACS analysis**

| Marker                             | Fluocrome       | Clone       | Company                       |
|------------------------------------|-----------------|-------------|-------------------------------|
| CD45                               | BV510           | 30-F11      | BD                            |
| CD3e                               | BV421           | 145-2C11    | BD                            |
| CD8                                | APC-Cy7         | 53-6.7      | BD                            |
| CD4                                | BUV496          | GK1.5       | BD                            |
| CD44                               | FITC            | IM7         | Biolegend                     |
| CD62L                              | PE-Cy7          | MEL-14      | BD                            |
| CD69                               | BB700           | H1.2F3      | BD                            |
| CD127                              | PE-Cy5          | A7R34       | Biolegend                     |
| PD1                                | BV785           | 29F.1A12    | Biolegend                     |
| TIM-3                              | BV605           | RMT3-23     | Biolegend                     |
| LAG-3                              | BV711           | C9B7W       | BD                            |
| Ki67                               | PE dazzle594    | 16A8        | Biolegend                     |
| CX3CR1                             | BV650           | SA011F11    | Biolegend                     |
| KLRG1                              | BUV737          | 2F1         | BD                            |
| Foxp3                              | A647            | 150D        | Biolegend                     |
| CD25                               | PE              | 3C7         | Biolegend                     |
| Livedead                           | Fixable dye 700 |             | BD                            |
| CD45                               | BV510           | 17A2        | BD                            |
| B220                               | APC-Cy7         | RA3-6B2     | Biolegend                     |
| IA/IE                              | BB700           | M5/114.15.2 | BD                            |
| CD11b                              | BUV395          | M1/70       | BD                            |
| Ly6G                               | BV421           | 1A8         | BD                            |
| CD11c                              | PE-Cy5          | N418        | Biolegend                     |
| Ly-6C                              | BV785           | HK1.4       | Biolegend                     |
| NK1.1                              | BUV737          | PK136       | BD                            |
| Livedead                           | Fixable dye 700 |             | BD                            |
| H-2Kb MuLV p15E Tetramer-KSPWF TTL | APC             |             | MBL International Corporation |

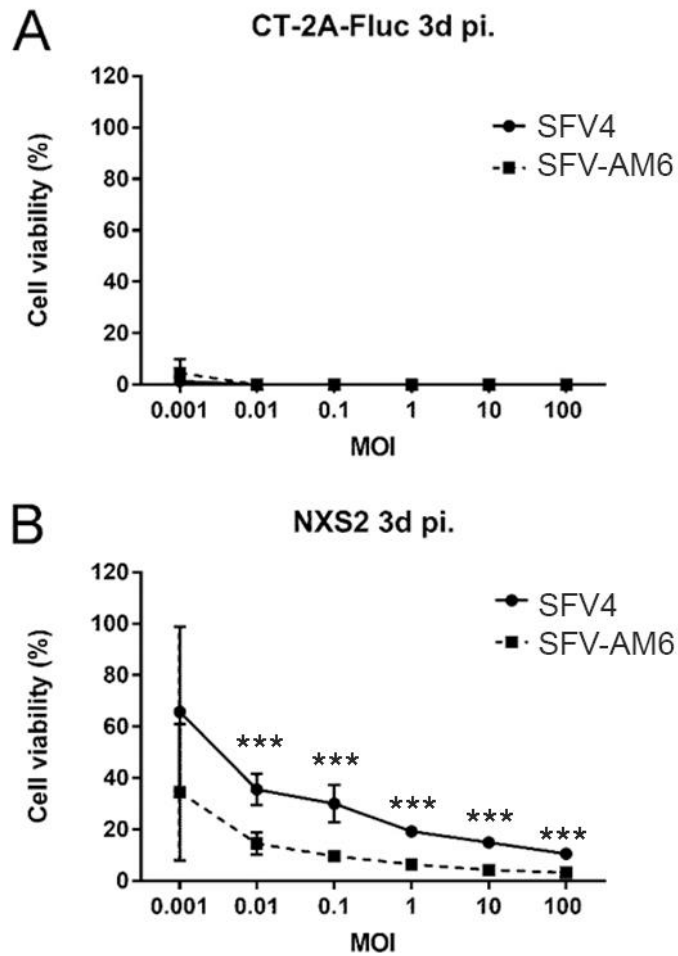

**Figure S1.** Cell viability of infected glioma CT-2A-Fluc **(A)** and neuroblastoma NXS2 **(B)** cells measured with MTS assay (mean  $\pm$  SD) 72 hours after infection using different MOIs. Statistical analysis was performed by two-tailed, unpaired t-test, \*  $p < 0.05$ , \*\*  $p < 0.01$ , \*\*\*  $p < 0.001$ .

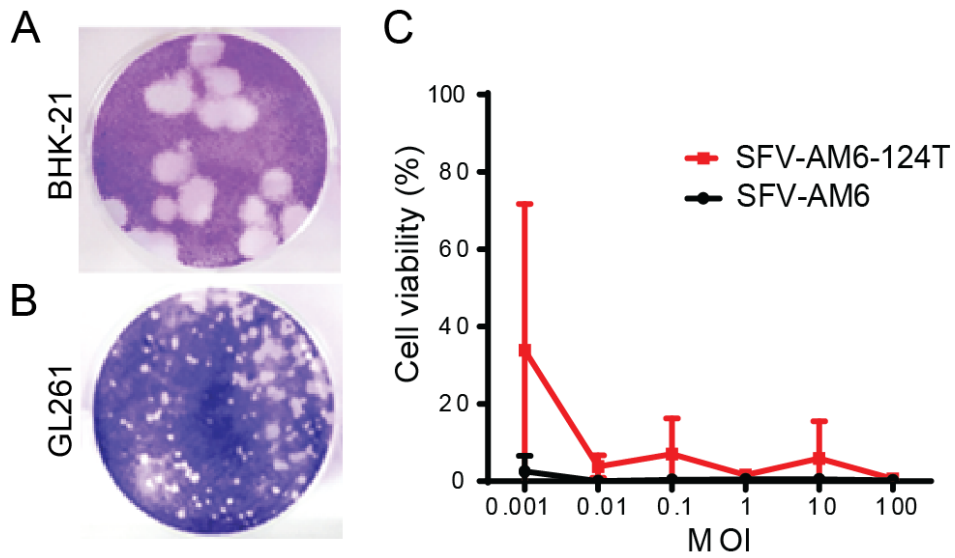

**Figure S2. miRNA-124 de-targeted SFV-AM6-124T retains oncolytic potency in GL261 cells.** **A:** Plaque phenotype of SFV-AM6-124T in BHK-21 cells. **B:** Plaque phenotype of SFV-AM6-124T in GL261 cells. **C:** Viability of GL261 cells measured with MTS assay 72h after infection (mean  $\pm$  SD).

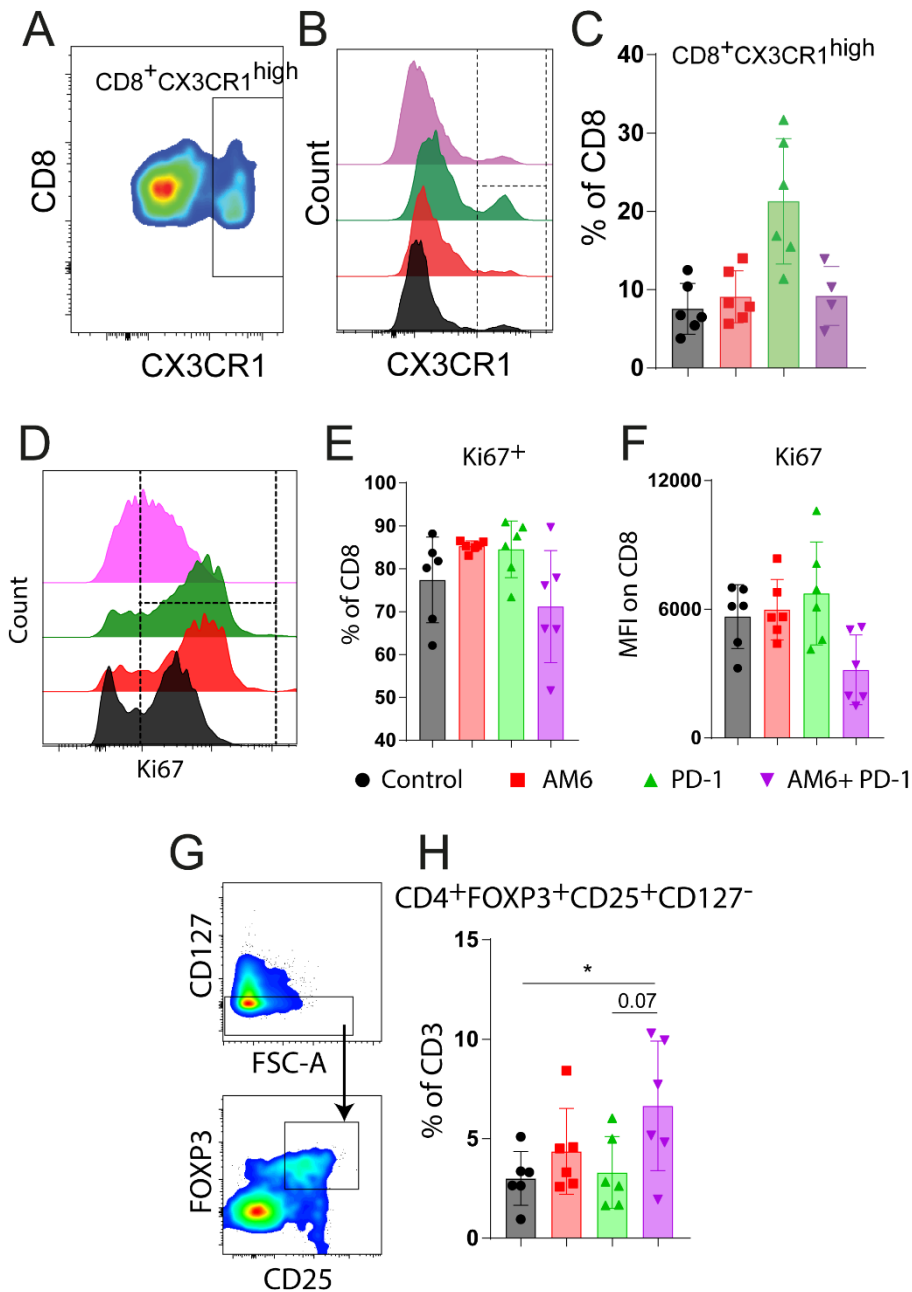

**Figure S3. T-cell phenotype after SFV-AM6-124T and anti-PD1 treatments:** **A:** Flow cytometry-gating strategy for quantification of CX3CR1 expressing CD8<sup>+</sup> T cells. **B:** Histograms showing CX3CR1 on CD8<sup>+</sup> T cells in the different treatment groups, and **C:** quantification of CX3CR1 in CD8<sup>+</sup> T cells. **D:** Histograms showing Ki67 expression on CD8<sup>+</sup> T cells in the different treatment groups. **E:** quantification of Ki67<sup>+</sup> CD8<sup>+</sup> T cells and **F:** MFI of Ki67 on CD8<sup>+</sup> T cells. **G:** Flow cytometry-gating strategy for quantification of Tregs and **H:** quantification of CD4<sup>+</sup> CD25<sup>+</sup>FOXP3<sup>+</sup>CD127<sup>-</sup> Tregs. Data plotted as mean ± SD.
